# Supplementary material for: Schottky–ohmic converted contact, fast-response, infrared PbTe photodetector with stable photoresponse in air
Source: Royal Society of Chemistry journal article supplement (doi:10.1039/c6ra22581k), 2016-01-01
Supplement: c6ra22581k1.pdf [file c6ra22581k1.pdf]

# Schottky-Ohmic Converted Contact, Fast-response, Infrared PbTe Photodetector with Stable Photoresponse in Air

Zhonghai Lin <sup>†a\*</sup>, Zhi Yang<sup>†b</sup>, Pingjian Wang<sup>a</sup>, Guangfen Wei<sup>a</sup>, Aixiang He<sup>a</sup>,  
Wen Guo<sup>a</sup>, Minqiang Wang<sup>b\*</sup>

<sup>a</sup> Key Laboratory of Intelligent Information Processing in Universities of Shandong,  
Shandong Business and Technology University, Yantai, 264005, China

<sup>b</sup>Electronic Materials Research Laboratory (EMRL), Key Laboratory of Education Ministry; International Center for Dielectric Research (ICDR), Xi'an Jiaotong University  
, Xi'an 710049 China.

Corresponding Author: zhonghailin@sdbt.edu.cn, mqwang@mail.xjtu.edu.cn

† These authors contributed equally to the work.

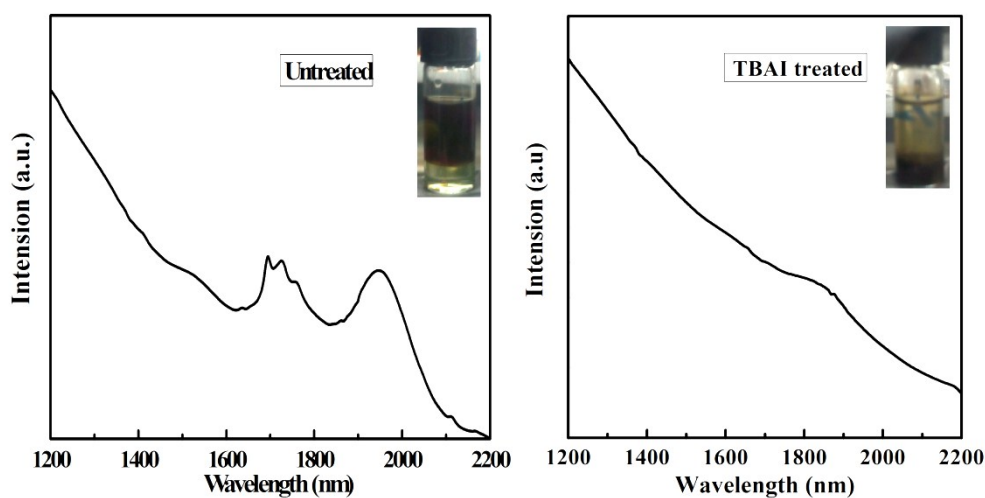

Figure S1 Absorption spectra of PbTe cQDs capped with OA and DMF. The insets are images of PbTe cQDs transfer from hexane to DMF upon exchange of OA with TBAI.

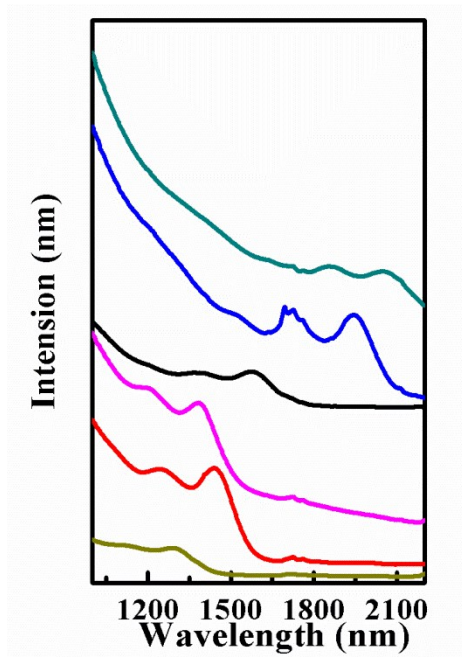

Figure S2 Optical absorption spectra from PbTe CQDs of different sizes

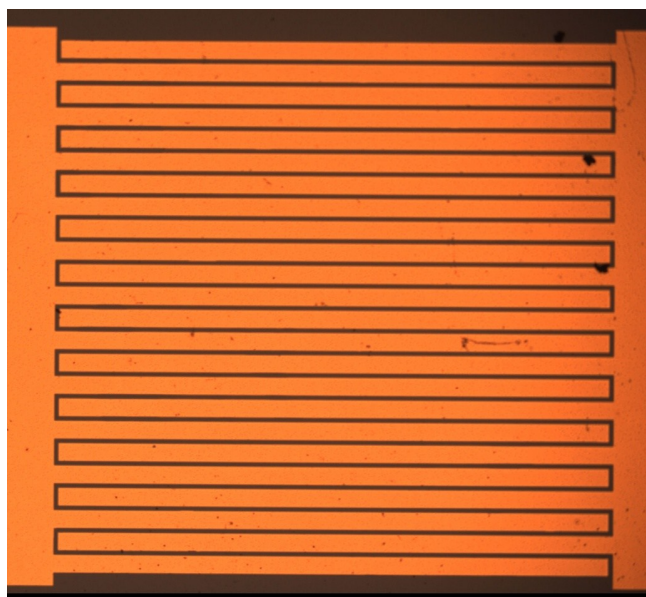

Figure S3 Image of Si/SiO<sub>2</sub> substrate with interdigital Ti/Au electrodes

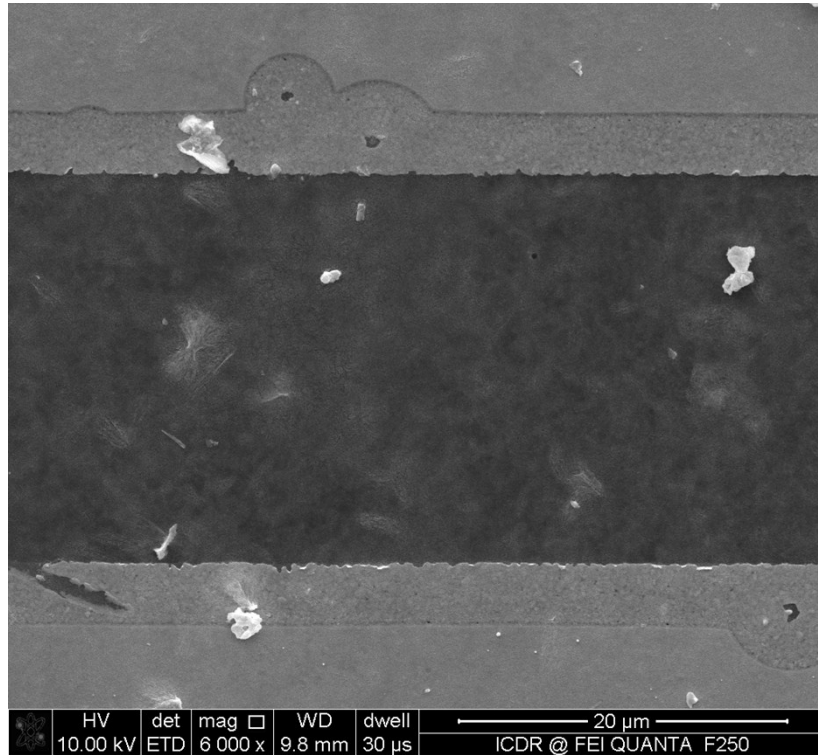

Figure S4 SEM image of PbTe CQD thin film

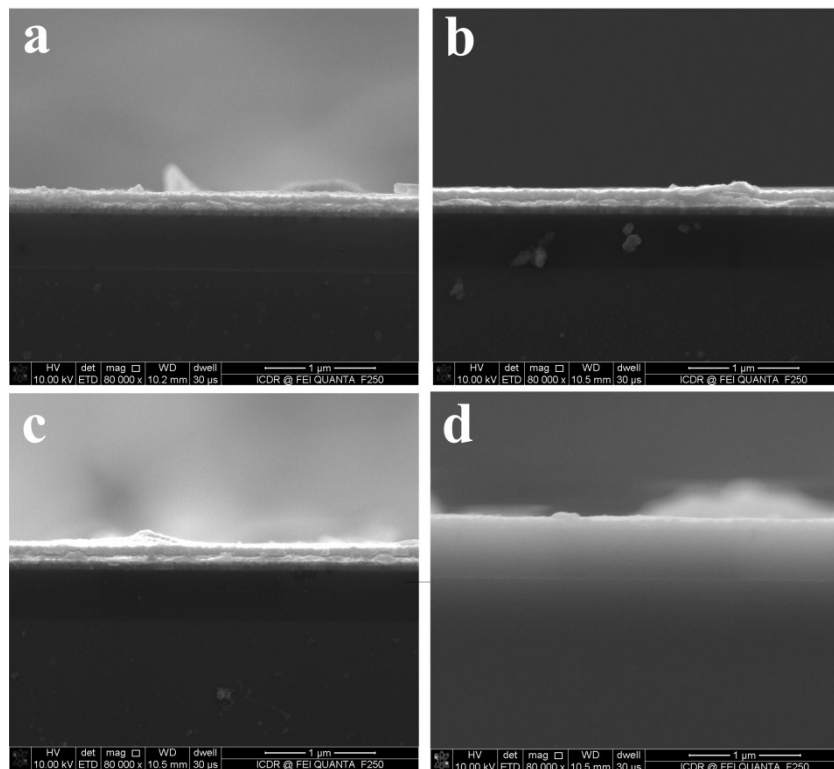

Figure S5 TBAI treated PbTe CQD thin film with different thickness through fabrication with (a) 4 cycles, 47 nm, (b) 6 cycles, 68 nm, (c) 8 cycles, 76 nm, (d) 12 cycles, 91 nm.

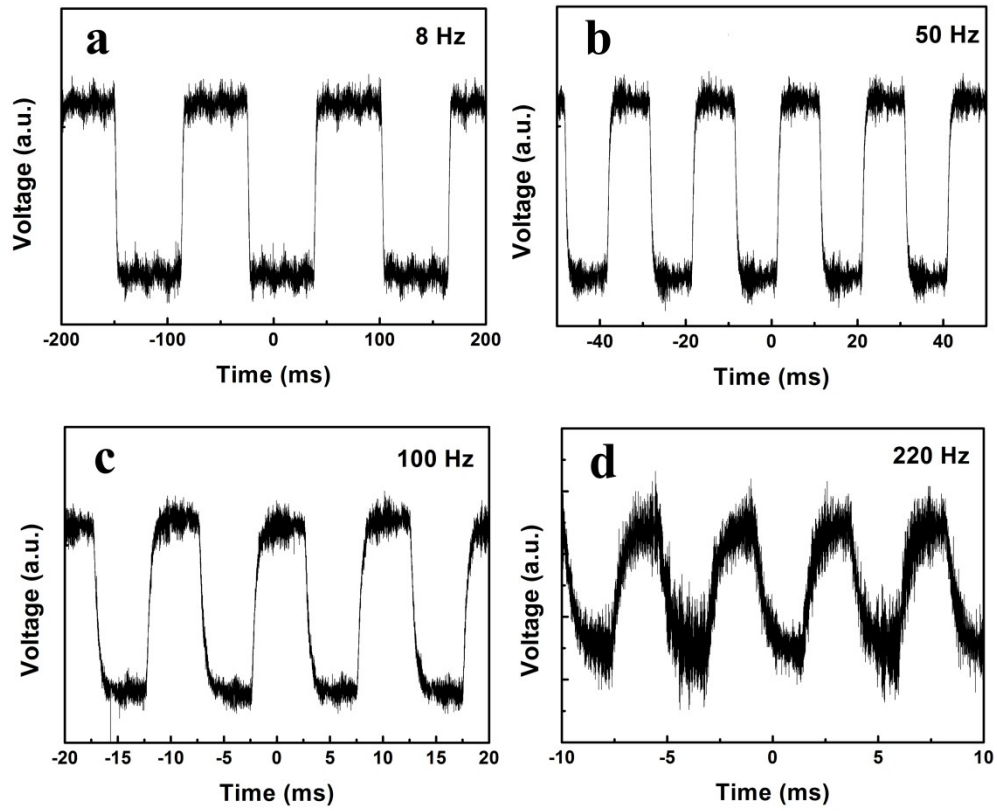

Figure S6 Time-dependent photoresponse under pulsating light of different frequency.
